# Supplementary material for: STATAWAARS: a promoter motif associated with spatial expression in the major effector-producing tissues of the plant-parasitic nematode Bursaphelenchus xylophilus
Source: PubMed Central journal article supplement (PMC6062891; doi:10.1186/s12864-018-4908-2), 2018-07-27
Supplement: 12864_2018_4908_MOESM3_ESM.pdf [file 12864_2018_4908_MOESM3_ESM.pdf]

**Table S3**– RNAseq mapped data from the two samples sequenced (BX-1, BX-2).

|      | <b>Trimmed reads input</b> | <b>Mapped reads</b>       |
|------|----------------------------|---------------------------|
| Bx-1 | 124218810                  | 37820234 (30.4% of input) |
| Bx-2 | 143259452                  | 34916231 (24.4% of input) |
