# Supplementary material for: STATAWAARS: a promoter motif associated with spatial expression in the major effector-producing tissues of the plant-parasitic nematode Bursaphelenchus xylophilus
Source: PubMed Central journal article supplement (PMC6062891; doi:10.1186/s12864-018-4908-2), 2018-07-27
Supplement: 12864_2018_4908_MOESM4_ESM.pdf [file 12864_2018_4908_MOESM4_ESM.pdf]

**Table S4** - Top 30 most highly represented genes in the gland cells tissues. SP: presence or absence of signal peptide; motif: presence of at least one repetition of the STATAWAARS motif; ISH: validated the spatial expression; NA: no signal; GC: signal in gland cells.

<sup>(1)</sup> According to *Bursaphelenchus xylophilus* genome version 1.2 (available in Gene DB)

<sup>(2)</sup> *in situ* hybridization

<sup>(3)</sup> based on Shinya et al., 2013

<sup>(4)</sup> based on results from Espada et al., 2016, *Mol. Plant Pathol.*

| Gene ID <sup>(1)</sup> | expression (FPKM) | SP | Motif | ISH <sup>(2)</sup> | Secretome <sup>(3)</sup> | post infection <sup>(4)</sup> | Gene Description (based on sequence similarity)                              |
|------------------------|-------------------|----|-------|--------------------|--------------------------|-------------------------------|------------------------------------------------------------------------------|
| BUX.s01226.3           | 43610,67          | +  | +     |                    |                          | -                             | Reverse transcriptase                                                        |
| BUX.s01226.2           | 34330,2           | +  | -     |                    |                          | DPI                           | Reverse transcriptase                                                        |
| BUX.s00083.32          | 28320,67          | +  | -     |                    | +                        | FF                            | Cysteine peptidase, family C1A (Proteinase inhibitor I29)                    |
| BUX.s01513.259         | 28133,97          | -  | -     |                    |                          | DPI                           | Not known                                                                    |
| BUX.s00364.143         | 20947,55          | -  | -     |                    |                          | DPI                           | Hypothetical protein; Metridin-like ShK toxin                                |
| BUX.s01281.223         | 20907,19          | +  | +     | GC                 |                          | DPI                           | Not known                                                                    |
| BUX.s00782.2           | 16572,97          | -  | +     |                    |                          | FF                            | Small HSP21-like protein; HSP20-like                                         |
| BUX.s01063.193         | 14530,48          | +  | +     |                    |                          | -                             | Transthyretin-like family protein                                            |
| BUX.s01109.570         | 13699,99          | +  | -     | NA                 |                          | DPI                           | Not known                                                                    |
| BUX.s01332.1           | 12613,75          | +  | -     |                    |                          | DPI                           | Not known                                                                    |
| BUX.s01639.10          | 12613,75          | +  | -     |                    |                          | -                             | Not known                                                                    |
| BUX.s01167.27          | 9072,31           | -  | -     |                    |                          | DPI                           | Not known                                                                    |
| BUX.s01144.234         | 8343,09           | +  | +     | GC                 | +                        | DPI                           | Thaumatococcus-like protein 1b                                               |
| BUX.s01144.128         | 8146,98           | +  | -     |                    | +                        | DPI                           | Not known                                                                    |
| BUX.s00532.10          | 7085,05           | +  | +     | NA                 |                          | DPI                           | Aspartic Peptidase, family A1                                                |
| BUX.s00036.112         | 6830,64           | +  | +     | GC                 | +                        | DPI                           | Beta-1,4-endoglucanase; GH45                                                 |
| BUX.s01259.45          | 6760,58           | +  | +     | NA                 | +                        | DPI                           | Cysteine protease family cathepsin 1; Proteinase inhibitor I29               |
| BUX.s01143.167         | 6745,18           | -  | -     |                    |                          | DPI                           | Not known                                                                    |
| BUX.s00647.61          | 5542,85           | +  | +     |                    | +                        | DPI                           | Not known                                                                    |
| BUX.s01167.26          | 5473,3            | -  | -     |                    |                          | DPI                           | Not known                                                                    |
| BUX.s01109.169         | 5433,02           | +  | -     |                    |                          | -                             | Sapogenin B domain                                                           |
| BUX.s01226.4           | 5245              | -  | -     |                    |                          | DPI                           | Hypothetical protein - common roundworm retrotransposon R4                   |
| BUX.s01226.1           | 5037,37           | -  | -     |                    |                          | DPI                           | Hypothetical protein - common roundworm retrotransposon R4                   |
| BUX.s00036.113         | 4504,83           | +  | +     | GC                 | +                        | DPI                           | Beta-1,4-endoglucanase ( <i>B. xylophilus</i> )                              |
| BUX.s00298.157         | 4309,6            | -  | -     |                    |                          | DPI                           | Eukaryotic translation elongation factor 1A protein ( <i>B. xylophilus</i> ) |
| BUX.s01144.122         | 4148,47           | +  | +     | GC                 |                          | DPI                           | Not known                                                                    |
| BUX.s00713.953         | 3997,31           | +  | +     | NA                 | +                        | DPI                           | Peptidase aspartic, family A1                                                |
| BUX.s00139.22          | 3881,41           | +  | +     |                    | +                        | -                             | Not known                                                                    |
| BUX.s01147.119         | 3703,45           | -  | -     |                    |                          | -                             | Calreticulin ( <i>B. xylophilus</i> )                                        |
| BUX.s01063.196         | 3408,99           | +  | -     |                    |                          | DPI                           | Not known                                                                    |
