# Supplementary material for: STATAWAARS: a promoter motif associated with spatial expression in the major effector-producing tissues of the plant-parasitic nematode Bursaphelenchus xylophilus
Source: PubMed Central journal article supplement (PMC6062891; doi:10.1186/s12864-018-4908-2), 2018-07-27
Supplement: 12864_2018_4908_MOESM7_ESM.pdf [file 12864_2018_4908_MOESM7_ESM.pdf]

**Table S7** – List of ten genes that have the presence of STATAWAARS motif and where selected to examine the spatial expression pattern in the nematode tissues (by *in situ* hybridization). For each selected gene: Sequence similarity analysis with BlastP, primers used for *in situ* hybridization and the results of the validation.

| Gene ID                | Forward primer       | Reverse primer        | Sequence similarity        | Localisation in the nematode tissues |
|------------------------|----------------------|-----------------------|----------------------------|--------------------------------------|
| <b>BUX.s01144.234</b>  | TGTCAAGATCACGGTCGTCA | TTCCACAAGCACCCAGTTTCG | Thaumatococin-like protein | Gland cells                          |
| <b>BUX.s01109.106</b>  | TATGACGTGGACACCCTCAG | GCGGCCTTGTCAGATTCTTT  | Pioneer                    | Gland cells                          |
| <b>BUX.s01145.19</b>   | ACAGCTGCCCAATGATTAC  | CCGCATTGATTACGTTGATG  | Alpha-beta hydrolase       | Gland cells                          |
| <b>BUX.s01147.71</b>   | CAAGGAGTAGCGGTGAGAGG | TTCTCAGTTCGGGTTTCGATT | Transthyretin-like protein | Gland cells                          |
| <b>BUX.s01066.8</b>    | AAACCGCAACGTGAAAGTGA | GACACCGTATTGTTGGCGA   | Lysozyme                   | Intestine                            |
| <b>BUX.s00713.837</b>  | TCTTCCATTTGAAGCCATCC | GTGGACTCAAAGCAACGTCA  | Pioneer                    | Intestine                            |
| <b>BUX.s00060.1</b>    | ACTTCACTCTGCTGCCTTCT | GACCGTGTCCAAGTTCCTAA  | Pioneer                    | No signal                            |
| <b>BUX.s00647.61</b>   | GCCGACCTTGTTGAACTTGT | TGTCCGACCTTCTGCAAGAT  | Pioneer                    | Gland cells                          |
| <b>BUX.s00713.1002</b> | CCATGCTGTACGAGCTGAAA | AATCGGAAAGTCGAACATGG  | Alpha-beta hydrolase       | Gland cells                          |
| <b>BUX.s00116.969</b>  | TGGACGTCCTCATCATCAGA | GATTTGGGGTGAAGGGTCTT  | Pioneer                    | Gland cells                          |
