# Supplementary material for: STATAWAARS: a promoter motif associated with spatial expression in the major effector-producing tissues of the plant-parasitic nematode Bursaphelenchus xylophilus
Source: BMC Genomics. 2018 Jul 27;19:553. doi: 10.1186/s12864-018-4908-2 (PMC6062891; doi:10.1186/s12864-018-4908-2)
Supplement: Supplementary file 1 — Table S1. List of verified effector genes from Bursaphelenchus xylophilus used for the analysis of the promoter regions using the differential motif discovery algorithm HOMER. The venny diagram compares the genes in the input effector list with the results from the first output from FIMO analysis. The motif STATWWAWRS is present in the promoter region of 26 genes verified effector genes, which represents approximatly 62% of the genes. (XLSX 102 kb) [file 12864_2018_4908_MOESM1_ESM.xlsx]

## Sheet: Folha1
Table S1- List of verified effector genes from Bursaphelenchus xylophilus used for the analysis of the promoter regions using the differential motif discovery algorithm HOMER. The venny diagram compares the genes in the input effector list with the results from the first output from FIMO analysis. The motif STATWWAWRS is present in the promoter region of 26 genes verified effector genes, which re…
Gene ID
BUX.s00705.10
BUX.s01066.63
BUX.s01066.142
BUX.s01066.143
BUX.s01066.65
BUX.s01066.145
BUX.s01281.230
BUX.s01281.229
BUX.s01281.223
BUX.s01281.224
BUX.s01281.215
BUX.s00460.341
BUX.s00713.913
BUX.s01259.21
BUX.s01259.23
BUX.s01259.22
BUX.s01259.20
BUX.s01281.346
BUX.s01281.345
BUX.s01281.344
BUX.s01281.341
BUX.s01281.342
BUX.s01661.75
BUX.01147.177
BUX.s01066.2
BUX.s00116.698
BUX.s00422.201
BUX.s00647.112
BUX.s01254.333
BUX.s00116.606
BUX.s00579.83
BUX.s00579.86
BUX.s00579.85
BUX.s00036.113
BUX.s00036.112
BUX.s01147.110
BUX.s00119.44
BUX.s01116.1
BUX.s00119.43
BUX.s00397.6
BUX.s00397.15
BUX.s00397.16
